# Supplementary material for: Biological Traits and Genetic Relationships Amongst Cultivars of Three Species of Tagetes (Asteraceae)
Source: MDPI journal article supplement (doi:10.3390/plants11060760), 2022-03-12
Supplement: s1 [file s1]

Table S1. Pairwise Nei genetic distances among 13 cultivars of *Tagetes* from three different species (*T. patula*, *T. tenuifolia*, and *T. erecta*) using six SSR markers (Table 6).

|                           | <i>T. patula</i> |                 |             |          |       | <i>T. tenuifolia</i> |                |          |               |       | <i>T. erecta</i> |                      |                           |
|---------------------------|------------------|-----------------|-------------|----------|-------|----------------------|----------------|----------|---------------|-------|------------------|----------------------|---------------------------|
|                           | Bolero           | Orange<br>Flame | Szinkeverek | Robuzsta | Orion | Luna Gold            | Luna<br>Orange | Luna Rot | Luna<br>Lemon | Sarga | Aranysarga       | Magas<br>Citromsarga | Cupid<br>Golden<br>Yellow |
| <i>T. patula</i>          |                  |                 |             |          |       |                      |                |          |               |       |                  |                      |                           |
| Bolero                    | 0.0              |                 |             |          |       |                      |                |          |               |       |                  |                      |                           |
| Orange<br>Flame           | 7.0              | 0.0             |             |          |       |                      |                |          |               |       |                  |                      |                           |
| Szinkeverek               | 11.0             | 8.0             | 0.0         |          |       |                      |                |          |               |       |                  |                      |                           |
| Robuzsta                  | 7.0              | 0.0             | 8.0         | 0.0      |       |                      |                |          |               |       |                  |                      |                           |
| Orion                     | 5.0              | 4.0             | 12.0        | 4.0      | 0.0   |                      |                |          |               |       |                  |                      |                           |
| <i>T. tenuifolia</i>      |                  |                 |             |          |       |                      |                |          |               |       |                  |                      |                           |
| Luna Gold                 | 10.3             | 12.3            | 12.3        | 12.3     | 10.3  | 0.0                  |                |          |               |       |                  |                      |                           |
| Luna Orange               | 13.3             | 14.3            | 14.3        | 14.6     | 14.3  | 6.8                  | 0.0            |          |               |       |                  |                      |                           |
| Luna Rot                  | 11.3             | 14.3            | 14.3        | 14.3     | 10.3  | 4.0                  | 7.8            | 0.0      |               |       |                  |                      |                           |
| Luna Lemon                | 10.0             | 13.0            | 9.0         | 14.3     | 9.0   | 4.0                  | 7.8            | 4.0      | 0.0           |       |                  |                      |                           |
| Sarga                     | 18.0             | 15.0            | 15.0        | 13.3     | 19.0  | 9.0                  | 7.8            | 7.0      | 12.0          | 0.0   |                  |                      |                           |
| <i>T. erecta</i>          |                  |                 |             |          |       |                      |                |          |               |       |                  |                      |                           |
| Aranysarga                | 13.0             | 10.0            | 10.0        | 12.7     | 14.0  | 8.2                  | 7.5            | 9.1      | 7.5           | 5.5   | 0.0              |                      |                           |
| Magas<br>Citromsarga      | 13.0             | 11.0            | 19.0        | 9.7      | 9.0   | 7.7                  | 12.5           | 8.7      | 10.0          | 14.0  | 15.0             | 0.0                  |                           |
| Cupid<br>Golden<br>Yellow | 19.0             | 16.0            | 16.0        | 14.7     | 20.0  | 9.7                  | 9.5            | 9.7      | 13.0          | 7.0   | 8.0              | 11.0                 | 0.0                       |
